# Supplementary material for: Insights into the thermodynamic–kinetic synergistic separation of propyne/propylene in anion pillared cage MOFs with entropy–enthalpy balanced adsorption sites
Source: Chem Sci. 2022 Nov 28;14(2):298–309. doi: 10.1039/d2sc05742e (PMC9811657; doi:10.1039/d2sc05742e)
Supplement: SC-014-D2SC05742E-s002 [file SC-014-D2SC05742E-s002.xlsx]

## Sheet: Sheet1
ZNU-2-Ge
							581.21
1.077	cm3/g	L/L	mol/g	mol/mol				cm3/g	L/L	mol/g	mol/mol				cm3/g	L/L	mol/g	mol/mol
Pressure	C3H4 (278K)	C3H4 (278K)	C3H4 (278K)	C3H4 (278K)			Pressure	C3H4 (298K)	C3H4 (298K)	C3H4 (298K)	C3H4 (298K)			Pressure	C3H4 (308K)	C3H4 (308K)	C3H4 (308K)	C3H4 (308K)
0.210571	92.0637	99.1526	4.10999				0.211599	33.2385	35.7979	1.48386	0.862436			0.212545	19.7728	21.2953	0.882714
0.420049	117.561	126.614	5.24827				0.421981	63.0903	67.9482	2.81653	1.63699			0.420805	38.9387	41.937	1.73834
0.631403	127.653	137.482	5.69879				0.630328	82.6035	88.964	3.68766	2.1433			0.632668	56.1192	60.4404	2.50532
0.842848	133.542	143.825	5.9617				0.842084	95.3843	102.729	4.25823	2.47492			0.843495	69.8769	75.2574	3.11951
1.05076	137.59	148.184	6.1424				1.05198	103.786	111.778	4.63332	2.69293			1.0502	80.1507	86.3223	3.57816
1.57737	144.423	155.544	6.44746				1.57769	116.442	125.408	5.19828	3.02129			1.5841	97.6078	105.124	4.35749
2.13674	149.118	160.6	6.65706				2.13385	123.923	133.465	5.53228	3.21542			2.11066	107.263	115.523	4.78854
2.96035	153.858	165.705	6.86867				2.92221	130.628	140.686	5.83161	3.38939			3.18246	118.564	127.693	5.29303
3.94958	157.772	169.92	7.04339				3.75608	135.427	145.855	6.04585	3.51391			3.97315	123.642	133.162	5.51973
5.06712	161.052	173.453	7.18984				4.73472	139.531	150.275	6.22906	3.62039			4.90885	128.037	137.896	5.71595
6.29511	163.79	176.402	7.31204				5.84161	143.033	154.046	6.3854	3.71126			5.95831	131.78	141.927	5.88305
7.60295	166.131	178.923	7.41658				7.04718	146.039	157.284	6.51959	3.78925			7.1385	135.004	145.399	6.02695
8.98172	168.124	181.069	7.50553				8.02289	148.035	159.434	6.60872	3.84105			8.4024	137.836	148.449	6.15337
10.4223	169.85	182.928	7.58257				9.3718	150.347	161.924	6.71194	3.90105			9.75584	140.304	151.107	6.26357
11.8913	171.377	184.573	7.65075				10.7766	152.396	164.13	6.80338	3.95419			10.776	141.929	152.857	6.33611
14.3829	173.505	186.865	7.74576				14.3166	156.372	168.413	6.98091	4.05738			14.3773	146.348	157.616	6.53338
18.1236	176.093	189.652	7.86129				18.1369	159.641	171.934	7.12684	4.14219			18.1044	149.818	161.354	6.68832
23.0016	178.735	192.498	7.97926				21.9627	162.202	174.691	7.24115	4.20863			21.9218	152.623	164.375	6.81351
25.6682	179.946	193.802	8.03332				25.6354	164.202	176.845	7.33043	4.26052			25.6218	154.836	166.758	6.9123
29.4163	181.469	195.442	8.1013				29.4469	165.983	178.763	7.40994	4.30673			29.4188	156.774	168.846	6.99884
33.223	182.868	196.949	8.16375				33.2529	167.58	180.484	7.48127	4.34819			33.2741	158.489	170.693	7.07542
37.0154	184.101	198.277	8.21881				37.0347	168.961	181.971	7.54291	4.38401			37.0325	159.989	172.308	7.14235
40.8035	185.28	199.547	8.27144				40.8309	170.222	183.329	7.59918	4.41672			40.8274	161.304	173.724	7.20106
44.5909	186.357	200.707	8.31952				44.6152	171.399	184.597	7.65176	4.44728			44.6642	162.663	175.188	7.26175
48.3886	187.332	201.757	8.36305				48.4104	172.482	185.763	7.70009	4.47537			48.4482	163.768	176.378	7.31106
52.1498	188.397	202.903	8.41057				52.2151	173.46	186.816	7.74373	4.50073			53.2142	165.07	177.781	7.3692
55.9314	189.449	204.036	8.45752				55.9923	174.406	187.835	7.78596	4.52528			55.9914	165.869	178.641	7.40488
59.7462	190.391	205.051	8.49961				59.7757	175.347	188.849	7.82801	4.54972			59.7456	166.866	179.715	7.4494
63.5368	191.255	205.982	8.53819				63.5469	176.31	189.886	7.871	4.57471			64.553	167.994	180.929	7.49972
67.3018	192.271	207.076	8.58353				67.319	177.15	190.791	7.90849	4.59649			67.3899	168.557	181.535	7.52485
71.098	193.239	208.118	8.62673				70.9805	177.85	191.545	7.93975	4.61466			72.0595	169.633	182.695	7.57292
74.8457	194.242	209.199	8.67152				74.9058	178.739	192.502	7.97943	4.63773			74.7621	170.188	183.293	7.59768
78.6363	195.228	210.261	8.71554				78.6719	179.657	193.49	8.02039	4.66153			78.6667	171.065	184.237	7.63683
82.417	196.281	211.395	8.76256				82.4666	180.406	194.297	8.05383	4.68097			82.4725	171.793	185.021	7.66935
86.1664	197.473	212.679	8.81578				86.2376	181.114	195.059	8.08543	4.69933			86.218	172.759	186.062	7.71246
89.9437	198.733	214.036	8.87202				89.9939	182.082	196.102	8.12865	4.72446			90.9536	173.803	187.186	7.75907
93.7228	199.909	215.302	8.92449				93.7866	182.94	197.027	8.16699	4.74673			93.8139	174.364	187.79	7.78411
98.6129	201.284	216.783	8.9859				97.5639	183.735	197.883	8.20248	4.76736			99.5086	175.446	188.955	7.83241
101.306	202.154	217.72	9.02473				101.37	184.497	198.704	8.23649	4.78713			104.099	176.323	189.9	7.87157
104.073	202.851	218.471	9.05585				104.099	185.16	199.417	8.26606	4.80431

## Sheet: ZNU-2-Si-C3H4
ZNU-2-Si
	Pressure	STP cm3/g	mmol/g				Pressure	STP cm3/g	mmol/g				Pressure	STP cm3/g	mmol/g
P/P0	kPa	C3H4 (278K)	C3H4 (278K)			P/P0	kPa	C3H4 (298K)	C3H4 (298K)			P/P0	kPa	C3H4 (308K)	C3H4 (308K)
0.002087	0.219168	90.6574	4.04721			0.001939	0.20362	32.317	1.44273			0.00199	0.208917	19.2572	0.859695
0.003974	0.41724	116.975	5.22208			0.003945	0.41426	63.421	2.83129			0.003949	0.414607	38.7928	1.73182
0.006027	0.632885	128.184	5.72248			0.006084	0.638848	85.6431	3.82335			0.005979	0.627748	56.9973	2.54452
0.00808	0.848432	134.415	6.00067			0.008061	0.84644	98.1591	4.3821			0.008066	0.846907	71.729	3.20219
0.009992	1.04913	138.291	6.17372			0.009994	1.04942	106.255	4.74354			0.009964	1.04621	81.7584	3.64993
0.01499	1.57378	145.08	6.4768			0.01405	1.47547	116.8	5.2143			0.01341	1.40813	94.7379	4.22937
0.01997	2.097	149.504	6.67427			0.01998	2.09767	125.541	5.6045			0.0198	2.07889	108.482	4.84294
0.03067	3.22003	155.692	6.95056			0.02849	2.99095	132.793	5.92827			0.02712	2.84749	117.356	5.23911
0.04413	4.63331	160.618	7.17045			0.03986	4.18571	138.896	6.20071			0.0365	3.83231	124.216	5.54534
0.06009	6.30916	164.545	7.34576			0.05367	5.63547	143.894	6.42384			0.04836	5.07777	129.976	5.80248
0.07765	8.15319	167.724	7.4877			0.06953	7.30022	148.006	6.60739			0.0625	6.5626	134.734	6.01489
0.09638	10.1199	170.347	7.60479			0.08699	9.13358	151.384	6.75823			0.0785	8.24212	138.666	6.19045
0.116	12.1762	172.514	7.70154			0.1057	11.0955	154.273	6.88717			0.09592	10.0712	141.982	6.33846
0.1364	14.3243	174.391	7.78531			0.1351	14.1806	157.737	7.04182			0.1146	12.0311	144.82	6.46519
0.1715	18.0031	176.951	7.89961			0.1715	18.0056	161.039	7.18925			0.137	14.3798	147.566	6.58775
0.2079	21.8297	179.135	7.9971			0.2075	21.7908	163.642	7.30544			0.1711	17.9648	150.917	6.73735
0.2438	25.5975	180.937	8.07755			0.2439	25.6125	165.834	7.40328			0.2073	21.7648	153.753	6.86398
0.2803	29.4263	182.471	8.14601			0.2799	29.3864	167.671	7.48531			0.2436	25.5778	156.101	6.96881
0.3162	33.2061	184.025	8.2154			0.3162	33.1976	169.317	7.55879			0.2804	29.4392	158.092	7.05767
0.353	37.0638	185.318	8.27314			0.3523	36.9957	170.756	7.62304			0.3159	33.1736	159.863	7.13672
0.3882	40.7572	186.504	8.32608			0.3882	40.7572	172.097	7.6829			0.3523	36.9916	161.409	7.20574
0.425	44.6235	187.714	8.38008			0.4253	44.6616	173.375	7.73994			0.3885	40.7944	162.81	7.26829
0.4611	48.4105	188.835	8.43013			0.4612	48.4263	174.657	7.79717			0.4253	44.6594	164.215	7.33103
0.4972	52.2075	189.827	8.47441			0.4972	52.2018	175.834	7.84973			0.4609	48.3957	165.52	7.38927
0.5332	55.9844	190.965	8.52524			0.5335	56.0135	177.017	7.90254			0.497	52.1876	166.74	7.44373
0.5693	59.7743	191.937	8.56861			0.5692	59.7626	178.07	7.94957			0.533	55.9627	167.765	7.4895
0.6056	63.5829	192.84	8.60893			0.6056	63.5932	179.053	7.99344			0.5691	59.7514	168.914	7.5408
0.641	67.3056	193.931	8.65765			0.6418	67.3842	180.102	8.04029			0.605	63.5237	169.989	7.58878
0.6768	71.0688	195.056	8.70788			0.6773	71.114	181.086	8.08417			0.6414	67.3477	170.902	7.62954
0.7129	74.8538	196.054	8.75242			0.713	74.8608	182.049	8.12718			0.6771	71.0972	171.94	7.67589
0.749	78.6479	197.099	8.79907			0.749	78.6464	183.04	8.17141			0.713	74.8686	172.951	7.72102
0.7845	82.3756	198.401	8.85719			0.785	82.4251	183.979	8.21334			0.7493	78.6744	173.846	7.761
0.82	86.0983	200.019	8.92941			0.8216	86.2654	184.946	8.2565			0.7853	82.4519	174.831	7.80496
0.8568	89.9627	201.289	8.9861			0.8574	90.0262	185.877	8.29806			0.8212	86.2252	175.828	7.84949
0.8923	93.6863	202.616	9.04538			0.8933	93.7933	186.841	8.3411			0.8571	89.9928	176.741	7.89021
0.9287	97.5159	203.894	9.10241			0.9293	97.5792	187.803	8.38406			0.8932	93.7845	177.683	7.93229
0.9648	101.305	205.041	9.15363			0.965	101.32	188.729	8.4254			0.929	97.5475	178.586	7.9726
0.9912	104.08	206.162	9.20365			0.9889	103.831	189.458	8.45792			0.9647	101.299	179.509	8.01379
												0.9884	103.78	180.175	8.04354

## Sheet: ZNU-2-Ti-C3H4
ZNU-2-Ti
	Pressure	STP cm3/g	mmol/g				Pressure	STP cm3/g	mmol/g				Pressure	STP cm3/g	mmol/g
P/P0	kPa	C3H4 (278K)	C3H4 (278K)			P/P0	kPa	C3H4 (298K)	C3H4 (298K)			P/P0	kPa	C3H4 (308K)	C3H4 (308K)
0.002056	0.215905	70.9575	3.16775			0.001977	0.207552	23.7717	1.06124			0.002007	0.210683	14.8064	0.660999
0.003952	0.414938	99.5643	4.44484			0.00395	0.414789	46.395	2.07121			0.004031	0.42328	28.8218	1.28669
0.005915	0.621081	112.021	5.00092			0.005955	0.625265	65.0597	2.90445			0.00598	0.627914	41.4982	1.8526
0.007937	0.833409	119.306	5.32615			0.008003	0.840363	78.625	3.51005			0.007914	0.830931	52.7836	2.35641
0.009933	1.04295	124.076	5.53912			0.009925	1.04215	87.37	3.90045			0.009969	1.04677	62.9753	2.8114
0.01412	1.483	130.762	5.83761			0.01401	1.47077	99.4164	4.43823			0.01359	1.42674	76.8122	3.42912
0.02011	2.11103	136.752	6.10499			0.02013	2.11363	109.293	4.87914			0.01981	2.07981	91.7198	4.09463
0.02736	2.87255	141.598	6.32135			0.02738	2.87462	116.297	5.19181			0.02743	2.88012	102.179	4.56157
0.03569	3.74776	145.469	6.49415			0.03587	3.76627	121.651	5.43083			0.03439	3.61125	108.353	4.83718
0.04582	4.81095	148.894	6.64706			0.04445	4.66732	125.528	5.60391			0.04186	4.39537	113.115	5.04976
0.05755	6.04274	151.94	6.78303			0.05674	5.95763	129.626	5.78686			0.05008	5.25815	117.079	5.22675
0.07079	7.43283	154.571	6.90049			0.07071	7.4246	133.124	5.94305			0.05978	6.27708	120.738	5.39009
0.08535	8.9613	156.831	7.00138			0.08606	9.03643	136.159	6.07852			0.06839	7.18085	123.369	5.50756
0.1012	10.6306	158.855	7.09175			0.103	10.8126	138.79	6.19598			0.08038	8.44037	126.362	5.64116
0.1361	14.2909	162.251	7.24337			0.1367	14.3488	142.773	6.37382			0.09354	9.82186	129.046	5.76098
0.1711	17.965	164.834	7.35867			0.1718	18.0397	145.861	6.51164			0.1077	11.3064	131.478	5.86956
0.2063	21.6608	166.879	7.44996			0.207	21.7319	148.336	6.62213			0.1361	14.2914	135.357	6.04273
0.2431	25.5279	168.663	7.52958			0.243	25.5176	150.445	6.71628			0.1726	18.1256	139.119	6.21066
0.279	29.2994	170.137	7.59539			0.2798	29.3789	152.237	6.79628			0.2065	21.6844	141.837	6.33203
0.3155	33.1305	171.502	7.65633			0.3161	33.1881	153.839	6.86781			0.2427	25.4857	144.186	6.43686
0.3516	36.9222	172.747	7.71192			0.352	36.9615	155.218	6.92938			0.2788	29.2759	146.217	6.52753
0.3877	40.7123	173.812	7.75948			0.388	40.7356	156.52	6.9875			0.3156	33.1414	147.979	6.60619
0.4249	44.6135	174.829	7.80489			0.4247	44.5901	157.767	7.04315			0.3517	36.9277	149.515	6.67478
0.4614	48.4455	175.762	7.84651			0.4607	48.3772	158.886	7.09313			0.3874	40.6741	150.929	6.7379
0.4968	52.1655	176.598	7.88385			0.4972	52.2083	159.956	7.14091			0.4245	44.5759	152.183	6.79389
0.5327	55.9301	177.512	7.92464			0.533	55.9638	160.97	7.18615			0.4607	48.3744	153.411	6.84869
0.5687	59.7095	178.32	7.96073			0.5687	59.7129	161.924	7.22875			0.4973	52.215	154.467	6.89586
0.6055	63.5724	179.129	7.99681			0.6054	63.5652	162.806	7.26811			0.5325	55.9116	155.521	6.94289
0.6415	67.358	179.853	8.02917			0.6407	67.273	163.697	7.3079			0.569	59.7491	156.402	6.98225
0.6772	71.1089	180.628	8.06373			0.6768	71.0646	164.591	7.34782			0.6048	63.5008	157.354	7.02474
0.713	74.869	181.277	8.09272			0.713	74.8672	165.363	7.38226			0.6413	67.3314	158.288	7.06641
0.7494	78.6871	182.045	8.12702			0.7489	78.6295	166.229	7.42092			0.6773	71.1185	159.092	7.10233
0.7848	82.4004	182.745	8.15826			0.7851	82.4333	167.089	7.45935			0.7129	74.8587	159.916	7.13911
0.8213	86.2336	183.329	8.18431			0.8213	86.2341	167.92	7.49641			0.7488	78.6248	160.728	7.17534
0.8566	89.9475	184.066	8.21722			0.8572	90.0032	168.692	7.53087			0.785	82.4232	161.536	7.21142
0.8935	93.8196	184.604	8.24127			0.893	93.7688	169.482	7.56616			0.8209	86.1898	162.293	7.24522
0.9287	97.5177	185.291	8.2719			0.929	97.5401	170.27	7.60132			0.857	89.9809	163.072	7.28002
0.9646	101.283	186.006	8.30382			0.965	101.327	171.052	7.63625			0.8928	93.7464	163.812	7.31306
0.9909	104.043	186.537	8.32754			0.9885	103.792	171.606	7.66099			0.9287	97.514	164.546	7.34579
												0.9647	101.29	165.256	7.37752
												0.9906	104.016	165.86	7.40446

## Sheet: ZNU-2-Nb-C3H4
ZNU-2-Nb
	Pressure	STP cm3/g	mmol/g				Pressure	STP cm3/g	mmol/g				Pressure	STP cm3/g	mmol/g
P/P0	kPa	C3H4 (278K)	C3H4 (278K)			P/P0	kPa	C3H4 (298K)	C3H4 (298K)			P/P0	kPa	C3H4 (308K)	C3H4 (308K)
0.002002	0.210232	42.1145	1.88011			0.002075	0.217829	14.6246	0.652883			0.00192	0.20159	8.16664	0.364582
0.004102	0.430748	74.9145	3.3444			0.003985	0.418442	27.2938	1.21847			0.004041	0.424293	16.7456	0.747573
0.005942	0.623908	90.7241	4.05018			0.006066	0.636958	40.3684	1.80216			0.005918	0.621428	24.1446	1.07788
0.008005	0.840479	101.038	4.51061			0.007966	0.836424	51.2265	2.2869			0.00799	0.838964	32.1198	1.43392
0.01001	1.05068	107.344	4.79214			0.009994	1.04938	61.2945	2.73636			0.009964	1.04619	39.3101	1.75492
0.01415	1.48533	115.539	5.15798			0.01366	1.43459	75.5675	3.37355			0.01298	1.36305	49.625	2.2154
0.02017	2.11789	122.648	5.47536			0.02005	2.10491	90.8944	4.05779			0.01767	1.85491	63.0913	2.81657
0.02801	2.9406	128.259	5.72585			0.02699	2.83428	100.553	4.48899			0.0252	2.64604	78.1395	3.48837
0.03819	4.00974	133.053	5.93988			0.03467	3.64032	107.196	4.78553			0.03475	3.64836	89.7589	4.0071
0.05086	5.3406	137.037	6.11771			0.04342	4.55905	112.523	5.02333			0.04187	4.3967	95.7116	4.27284
0.06541	6.86788	140.328	6.26465			0.05405	5.6757	117.134	5.22921			0.05072	5.32551	101.031	4.51032
0.08104	8.50916	143.022	6.38491			0.06645	6.97682	121.124	5.40732			0.06149	6.45643	105.829	4.72453
0.09797	10.2866	145.28	6.48571			0.08029	8.43014	124.564	5.56087			0.0739	7.75942	109.965	4.90914
0.1158	12.1564	147.195	6.57122			0.09582	10.0609	127.569	5.69503			0.08771	9.20962	113.548	5.0691
0.1342	14.0919	148.874	6.64615			0.1121	11.7678	130.116	5.80873			0.1026	10.7778	116.616	5.20609
0.1721	18.0694	151.556	6.76588			0.1356	14.2334	133.025	5.93863			0.1355	14.2239	121.612	5.42911
0.2081	21.855	153.581	6.85631			0.1718	18.035	136.474	6.09258			0.1719	18.0496	125.67	5.61027
0.2443	25.652	155.263	6.93141			0.2079	21.8251	139.183	6.21351			0.2076	21.8014	128.73	5.74687
0.2805	29.4522	156.73	6.99688			0.2444	25.6619	141.434	6.31403			0.2446	25.6856	131.259	5.85979
0.3165	33.2333	157.995	7.05334			0.2803	29.429	143.256	6.39534			0.2802	29.4184	133.273	5.9497
0.3524	36.9982	159.151	7.10496			0.3163	33.2067	144.868	6.46732			0.3164	33.222	135.125	6.03237
0.3889	40.8371	160.251	7.15406			0.3524	36.9971	146.283	6.53051			0.3529	37.0578	136.704	6.10286
0.4254	44.6693	161.219	7.19726			0.388	40.745	147.689	6.59326			0.3887	40.8107	138.141	6.167
0.4615	48.4558	162.12	7.2375			0.4257	44.7032	148.97	6.65044			0.4257	44.6962	139.495	6.22743
0.4978	52.2711	163.062	7.27955			0.4612	48.4228	150.13	6.70223			0.4616	48.4722	140.703	6.28138
0.5338	56.0485	163.98	7.32053			0.498	52.286	151.079	6.74461			0.4974	52.23	141.906	6.33508
0.5694	59.7844	164.78	7.35625			0.5334	56.0057	152.148	6.79234			0.5336	56.027	142.883	6.37872
0.6059	63.6159	165.492	7.38805			0.5701	59.8633	152.998	6.83027			0.5692	59.765	143.941	6.42592
0.6421	67.4256	166.262	7.4224			0.6052	63.5475	153.97	6.87364			0.6056	63.5848	144.979	6.47226
0.6778	71.1672	167.049	7.45754			0.6416	67.365	154.923	6.91623			0.642	67.4084	145.845	6.51095
0.7142	74.9953	167.646	7.4842			0.6774	71.1261	155.836	6.95695			0.6776	71.1477	146.813	6.55415
0.7492	78.6619	168.469	7.52094			0.7135	74.918	156.695	6.99529			0.7137	74.9425	147.71	6.59419
0.7862	82.5496	169.349	7.56023			0.7493	78.6733	157.547	7.03334			0.7496	78.7062	148.637	6.63558
0.8212	86.23	170.14	7.59552			0.7856	82.486	158.322	7.06794			0.7856	82.487	149.488	6.67355
0.8574	90.0259	170.911	7.62997			0.8211	86.2205	159.138	7.10437			0.8215	86.2557	150.346	6.71185
0.8934	93.8113	171.614	7.66134			0.8577	90.056	159.794	7.13366			0.8574	90.0322	151.229	6.7513
0.9296	97.6034	172.388	7.6959			0.8933	93.8	160.619	7.17051			0.8931	93.7771	152.082	6.78936
0.9652	101.347	173.167	7.73067			0.9293	97.572	161.442	7.20722			0.929	97.5463	152.923	6.82692
0.9912	104.079	173.808	7.75929			0.9651	101.334	162.273	7.24435			0.965	101.321	153.719	6.86248
						0.9913	104.082	162.981	7.27592			0.9915	104.112	154.258	6.8865

## Sheet: Sheet5
ZNU-2-Ge
1.077	cm3/g	L/L	mol/g				cm3/g	L/L	mol/g				cm3/g	L/L	mol/g
Pressure	C3H6 (278K)	C3H6 (278K)	C3H6 (278K)			Pressure	C3H6 (298K)	C3H6 (298K)	C3H6 (298K)			Pressure	C3H6 (308K)	C3H6 (308K)	C3H6 (308K)
0.212912	8.05123	8.67117	0.35943			0.222649	2.96496	3.19326	0.132364			0.218789	1.84884	1.9912	0.0825376
0.422496	16.9673	18.2737	0.757467			0.423204	5.77754	6.22241	0.257926			0.431431	3.69051	3.97468	0.164755
0.630366	26.4705	28.5087	1.18172			0.638625	8.91919	9.60597	0.398178			0.635991	5.50655	5.93055	0.245828
0.840722	36.1217	38.9031	1.61258			0.843334	12.0182	12.9436	0.536527			0.850286	7.46013	8.03456	0.333041
1.05188	45.1141	48.5878	2.01402			1.06064	15.411	16.5977	0.687992			1.05933	9.40639	10.1307	0.419928
1.57794	62.5947	67.4145	2.7944			1.58814	23.9391	25.7825	1.06871			1.58504	14.5746	15.6968	0.65065
2.11156	74.0716	79.7751	3.30677			2.1103	32.2933	34.7798	1.44166			2.125	20.0144	21.5555	0.893498
2.90237	84.4577	90.9609	3.77043			2.89268	43.5474	46.9006	1.94408			2.86959	27.4071	29.5175	1.22353
3.66421	90.8181	97.8111	4.05438			3.6328	52.4013	56.4362	2.33934			3.89044	36.9837	39.8315	1.65106
4.40224	95.2214	102.553	4.25096			4.425	59.9277	64.5421	2.67534			4.49326	41.992	45.2254	1.87464
5.26898	99.1573	106.792	4.42666			5.17382	65.624	70.677	2.92964			5.19234	47.2506	50.8888	2.1094
6.26627	102.608	110.509	4.58071			5.9613	70.4841	75.9113	3.14661			5.95887	52.3113	56.3393	2.33533
7.37927	105.617	113.749	4.71503			6.78641	74.6424	80.3898	3.33225			6.7305	56.6961	61.0616	2.53107
8.5956	108.243	116.578	4.83228			7.7005	78.4585	84.4998	3.50261			7.56851	60.8489	65.5343	2.71647
9.90354	110.544	119.055	4.93498			8.71369	81.9339	88.2428	3.65776			8.47648	64.7368	69.7216	2.89004
11.2891	112.55	121.217	5.02457			9.81289	85.0909	91.6429	3.7987			9.4665	68.3323	73.5939	3.05055
14.3267	116.008	124.941	5.17895			10.9944	87.9456	94.7174	3.92614			10.6207	71.929	77.4676	3.21112
18.1551	119.221	128.401	5.32238			14.3326	94.0039	101.242	4.1966			14.3046	80.373	86.5618	3.58808
21.8464	121.59	130.952	5.42813			18.1555	98.8405	106.451	4.41252			18.113	86.3219	92.9687	3.85366
25.655	123.57	133.085	5.51653			21.8994	102.348	110.229	4.56912			21.9575	90.7687	97.7579	4.05217
29.4665	125.216	134.857	5.58999			25.7267	105.164	113.262	4.69483			25.6698	94.0629	101.306	4.19924
33.2526	126.634	136.384	5.65329			29.4022	107.384	115.652	4.79391			29.4968	96.871	104.33	4.3246
37.0445	127.847	137.691	5.70746			33.2147	109.332	117.75	4.88087			33.3033	99.1624	106.798	4.42689
40.8301	128.95	138.879	5.7567			37.0185	110.949	119.492	4.95309			36.996	101.054	108.835	4.51135
44.63	129.987	139.996	5.80298			40.8728	112.428	121.085	5.01911			40.7975	102.789	110.704	4.58881
48.416	130.888	140.967	5.84323			44.6275	113.713	122.469	5.07647			44.5823	104.34	112.375	4.65805
52.2147	131.724	141.866	5.88051			48.4235	114.874	123.719	5.12828			48.4154	105.689	113.828	4.71828
56.034	132.521	142.725	5.9161			52.1997	115.869	124.79	5.17271			52.1796	106.896	115.127	4.77214
59.7791	133.221	143.479	5.94738			55.9898	116.853	125.851	5.21664			55.9597	108.009	116.325	4.82181
63.5754	133.898	144.208	5.97758			59.7795	117.699	126.762	5.25441			59.7544	109.046	117.442	4.86811
67.3535	134.514	144.872	6.0051			63.5514	118.506	127.631	5.29044			63.5514	109.959	118.426	4.90888
71.127	135.146	145.552	6.0333			67.3449	119.287	128.473	5.32533			67.3441	110.841	119.375	4.94824
74.9139	135.689	146.138	6.05756			71.1326	119.972	129.209	5.35587			71.115	111.63	120.225	4.98348
78.6902	136.23	146.719	6.08168			74.9304	120.626	129.915	5.38511			74.9364	112.383	121.036	5.01709
82.3171	136.763	147.293	6.10547			78.5488	121.231	130.565	5.41208			78.6697	113.1	121.809	5.04912
86.1059	137.279	147.85	6.12854			82.4917	121.854	131.237	5.43991			82.4813	113.767	122.528	5.07891
90.0535	137.788	148.397	6.15124			86.1182	122.373	131.795	5.46306			86.2764	114.389	123.197	5.10666
93.6781	138.249	148.894	6.17183			89.8845	122.913	132.378	5.48721			89.8834	114.927	123.777	5.13068
97.594	138.696	149.375	6.19178			93.6577	123.422	132.926	5.50992			93.8369	115.541	124.437	5.15806
101.223	139.126	149.838	6.21096			97.6207	123.933	133.476	5.53273			97.6354	116.071	125.008	5.18174
103.965	139.428	150.164	6.22446			101.221	124.39	133.968	5.55312			101.375	116.579	125.555	5.2044
						103.959	124.728	134.332	5.56821			103.948	116.898	125.899	5.21865

## Sheet: ZNU-2-Si-C3H6
ZNU-2-Si
	Pressure	STP cm3/g	mmol/g				Pressure	STP cm3/g	mmol/g				Pressure	STP cm3/g	mmol/g
P/P0	kPa	C3H6 (278K)	C3H6 (278K)			P/P0	kPa	C3H6 (298K)	C3H6 (298K)			P/P0	kPa	C3H6 (308K)	C3H6 (308K)
0.002021	0.212237	8.11752	0.362389			0.002116	0.222198	3.08472	0.137711			0.002077	0.218132	1.9485	0.0869868
0.004066	0.426972	17.5823	0.784923			0.004107	0.431183	6.13832	0.274032			0.004106	0.431087	3.85976	0.172311
0.006059	0.636192	27.3015	1.21882			0.006042	0.634421	9.24882	0.412894			0.006031	0.633214	5.75353	0.256854
0.007969	0.836773	36.8818	1.64651			0.008071	0.847501	12.6749	0.565844			0.007992	0.83919	7.73322	0.345233
0.009923	1.04194	46.1212	2.05898			0.01022	1.07281	16.3526	0.730025			0.009969	1.04674	9.76903	0.436117
0.01298	1.363	58.3281	2.60393			0.01364	1.4321	22.4531	1.00237			0.01285	1.34913	12.9217	0.576864
0.01976	2.07451	76.3924	3.41037			0.01826	1.91679	30.7827	1.37423			0.01885	1.97953	19.5523	0.87287
0.02761	2.8986	88.0226	3.92958			0.0245	2.573	41.262	1.84205			0.02493	2.6175	26.4543	1.18099
0.03567	3.74489	95.4009	4.25897			0.03373	3.54168	54.099	2.41514			0.03332	3.49861	35.4814	1.58399
0.04602	4.83215	101.751	4.54247			0.04166	4.37392	62.6118	2.79517			0.04182	4.39071	43.7359	1.9525
0.05893	6.18733	107.126	4.78243			0.05033	5.28443	69.7623	3.11439			0.05057	5.3103	50.9904	2.27636
0.07399	7.76905	111.344	4.97072			0.06065	6.36785	76.3451	3.40826			0.06026	6.32747	57.7913	2.57997
0.09053	9.50514	114.975	5.1328			0.07276	7.63947	82.1597	3.66785			0.07112	7.46773	64.0153	2.85782
0.1088	11.4278	117.911	5.26389			0.08631	9.06246	87.1598	3.89106			0.08342	8.75908	69.7046	3.11181
0.136	14.276	121.262	5.41347			0.1015	10.6538	91.4855	4.08418			0.09685	10.1688	74.7875	3.33873
0.1722	18.0854	124.554	5.56043			0.1358	14.2551	98.49	4.39688			0.1074	11.2729	78.057	3.48469
0.2084	21.877	127.066	5.67257			0.1723	18.0902	103.54	4.62233			0.1356	14.2337	84.942	3.79205
0.2444	25.6662	129.08	5.76248			0.2082	21.8596	107.214	4.78635			0.1721	18.0732	91.242	4.0733
0.2804	29.4425	130.831	5.84068			0.2448	25.7036	110.122	4.91617			0.2081	21.8461	95.8147	4.27744
0.3168	33.2659	132.325	5.90737			0.2805	29.4482	112.465	5.02077			0.2442	25.6431	99.3813	4.43666
0.3528	37.0465	133.574	5.96314			0.3166	33.238	114.475	5.11047			0.2805	29.4537	102.285	4.56627
0.3891	40.8533	134.713	6.01397			0.3527	37.0308	116.148	5.1852			0.3166	33.2438	104.711	4.67458
0.426	44.7314	135.777	6.06146			0.3888	40.825	117.624	5.25108			0.3526	37.0234	106.737	4.76506
0.4618	48.4903	136.743	6.10459			0.4257	44.6958	119.006	5.31278			0.3889	40.8332	108.542	4.84565
0.4982	52.3161	137.589	6.14237			0.4619	48.5035	120.195	5.36585			0.4259	44.7238	110.176	4.91855
0.5338	56.0492	138.397	6.17842			0.4979	52.2774	121.262	5.41347			0.4617	48.4803	111.596	4.98198
0.5698	59.8288	139.149	6.21199			0.5343	56.098	122.269	5.45842			0.4981	52.297	112.846	5.03777
0.606	63.6291	139.837	6.24272			0.5701	59.8571	123.157	5.49808			0.5338	56.0523	113.991	5.08887
0.6419	67.4003	140.478	6.27132			0.6061	63.6365	123.985	5.53504			0.5704	59.8911	115.069	5.137
0.6786	71.2541	141.121	6.30002			0.6422	67.4319	124.752	5.56927			0.6058	63.6135	116.034	5.18009
0.7139	74.9646	141.73	6.32725			0.6783	71.2181	125.493	5.60238			0.6419	67.3974	116.916	5.21946
0.7501	78.7567	142.298	6.35261			0.714	74.9715	126.173	5.63272			0.6781	71.2034	117.76	5.25715
0.786	82.5283	142.853	6.37734			0.75	78.754	126.83	5.66206			0.7139	74.9571	118.53	5.29153
0.8223	86.3412	143.371	6.40049			0.7862	82.5515	127.441	5.68934			0.7504	78.7897	119.308	5.32625
0.858	90.0933	143.868	6.42266			0.822	86.3077	128.049	5.71646			0.7861	82.5366	119.987	5.35657
0.8941	93.8845	144.356	6.44446			0.8585	90.141	128.618	5.74186			0.8221	86.3218	120.643	5.38587
0.9301	97.6575	144.829	6.4656			0.8943	93.9067	129.163	5.76619			0.8579	90.0834	121.241	5.41253
0.9659	101.42	145.255	6.4846			0.93	97.6524	129.672	5.78893			0.8941	93.8784	121.826	5.43864
0.9898	103.933	145.604	6.50018			0.9659	101.422	130.145	5.81005			0.93	97.654	122.402	5.46437
						0.9907	104.023	130.475	5.82477			0.9663	101.466	122.953	5.48899
												0.9907	104.027	123.306	5.50472

## Sheet: ZNU-2-Ti-C3H6
ZNU-2-Ti
	Pressure	STP cm3/g	mmol/g				Pressure	STP cm3/g	mmol/g				Pressure	STP cm3/g	mmol/g
P/P0	kPa	C3H6 (278K)	C3H6 (278K)			P/P0	kPa	C3H6 (298K)	C3H6 (298K)			P/P0	kPa	C3H6 (308K)	C3H6 (308K)
0.001922	0.20183	6.37022	0.284385			0.00204	0.214149	2.5463	0.113674			0.001999	0.209932	1.70747	0.0762262
0.003914	0.410958	14.1661	0.632413			0.004037	0.423911	5.18499	0.231473			0.003963	0.416151	3.3878	0.151241
0.006021	0.632237	23.0908	1.03084			0.006047	0.634963	7.95563	0.355162			0.006456	0.67793	5.61383	0.250617
0.008004	0.840417	31.7287	1.41646			0.007977	0.837545	10.7354	0.479257			0.007979	0.837773	7.00532	0.312738
0.01001	1.05078	39.9492	1.78345			0.009947	1.04448	13.6581	0.609735			0.009837	1.03284	8.7291	0.389692
0.01312	1.37805	50.6455	2.26096			0.01326	1.39265	18.7791	0.838354			0.01199	1.25868	10.7611	0.480408
0.0186	1.95286	63.8671	2.85121			0.01773	1.86126	25.7245	1.14841			0.01495	1.57021	13.7101	0.612059
0.02477	2.60117	73.161	3.26612			0.02409	2.52922	35.0234	1.56354			0.0188	1.97382	17.6083	0.786086
0.03459	3.63244	82.1105	3.66565			0.03374	3.54306	46.6308	2.08173			0.02411	2.5311	22.9519	1.02464
0.04318	4.53362	87.3252	3.89845			0.04216	4.42628	54.3951	2.42835			0.03241	3.40259	30.9072	1.37979
0.05371	5.63908	91.904	4.10286			0.04985	5.23405	59.9441	2.67608			0.04195	4.40482	39.087	1.74495
0.06597	6.92687	95.9181	4.28206			0.0589	6.1848	65.047	2.90388			0.0497	5.219	44.7434	1.99747
0.08005	8.40572	99.4524	4.43984			0.06725	7.06119	68.8574	3.07399			0.05825	6.11656	50.0454	2.23417
0.0953	10.0068	102.451	4.57372			0.07907	8.30267	73.2047	3.26807			0.06798	7.13764	55.0449	2.45736
0.1122	11.7761	105.052	4.68983			0.09215	9.67609	77.0238	3.43856			0.07888	8.28252	59.672	2.66393
0.1359	14.2719	108.129	4.82717			0.1064	11.176	80.4082	3.58965			0.09081	9.53541	63.8583	2.85082
0.1718	18.0377	111.638	4.98385			0.135	14.1753	85.6115	3.82194			0.104	10.9221	67.6782	3.02135
0.2083	21.8721	114.388	5.10659			0.1714	17.9982	90.3607	4.03396			0.1349	14.1667	74.3807	3.32057
0.2444	25.6607	116.549	5.20308			0.2077	21.8042	93.9456	4.194			0.1718	18.0345	79.9961	3.57125
0.2808	29.4846	118.439	5.28744			0.2442	25.6392	96.817	4.32219			0.2076	21.7949	84.0824	3.75368
0.3164	33.2259	120.002	5.35722			0.2804	29.4465	99.1918	4.4282			0.2439	25.6125	87.3499	3.89955
0.3525	37.017	121.366	5.41811			0.3166	33.2474	101.213	4.51844			0.2801	29.4115	90.0294	4.01917
0.3885	40.7969	122.598	5.4731			0.3527	37.0284	102.931	4.59515			0.3165	33.2306	92.3328	4.122
0.4261	44.7381	123.739	5.52404			0.3887	40.8122	104.455	4.66315			0.3523	36.9873	94.2461	4.20742
0.4618	48.4885	124.774	5.57025			0.4254	44.6675	105.875	4.72657			0.3888	40.8262	95.9968	4.28557
0.4976	52.2479	125.684	5.61091			0.4616	48.4654	107.115	4.78192			0.4254	44.6665	97.5618	4.35544
0.5343	56.099	126.528	5.64856			0.4975	52.2399	108.244	4.83231			0.4619	48.4974	98.9724	4.41841
0.5698	59.8264	127.315	5.6837			0.5336	56.0232	109.255	4.87748			0.4977	52.2587	100.221	4.47416
0.6064	63.6678	128.089	5.71826			0.5696	59.8107	110.21	4.9201			0.5338	56.0524	101.369	4.52542
0.6418	67.385	128.738	5.74724			0.6058	63.6087	111.102	4.9599			0.5696	59.8103	102.423	4.57244
0.6779	71.1775	129.389	5.77627			0.6421	67.4189	111.938	4.99722			0.6057	63.6001	103.393	4.61577
0.7138	74.9536	130.015	5.80425			0.6785	71.2429	112.742	5.03311			0.6417	67.3811	104.298	4.65615
0.75	78.7471	130.616	5.83109			0.714	74.9684	113.453	5.06486			0.6777	71.1595	105.181	4.69557
0.7864	82.57	131.156	5.85519			0.7499	78.7402	114.137	5.0954			0.714	74.9721	105.973	4.73093
0.8219	86.3032	131.691	5.87908			0.786	82.5349	114.818	5.12579			0.7502	78.7738	106.728	4.76463
0.8582	90.1134	132.17	5.90043			0.8221	86.3235	115.432	5.1532			0.7859	82.5234	107.455	4.7971
0.8943	93.906	132.691	5.92371			0.8582	90.1074	116.028	5.17983			0.8223	86.3467	108.134	4.82741
0.9303	97.681	133.198	5.94634			0.8942	93.8893	116.625	5.20648			0.8585	90.1402	108.778	4.85617
0.9661	101.444	133.67	5.96741			0.9301	97.6619	117.171	5.23086			0.8942	93.8872	109.403	4.88407
0.9902	103.972	133.939	5.97943			0.966	101.43	117.672	5.25323			0.9302	97.6758	110.003	4.91083
						0.9902	103.974	118.009	5.26827			0.9659	101.418	110.573	4.93628
												0.992	104.157	110.99	4.9549

## Sheet: ZNU-2-Nb-C3H6
ZNU-2-Nb
	Pressure	STP cm3/g	mmol/g				Pressure	STP cm3/g	mmol/g				Pressure	STP cm3/g	mmol/g
P/P0	kPa	C3H6 (278K)	C3H6 (278K)			P/P0	kPa	C3H6 (298K)	C3H6 (298K)			P/P0	kPa	C3H6 (308K)	C3H6 (308K)
0.001998	0.209821	6.27122	0.279965			0.002072	0.217553	2.69743	0.120421			0.002055	0.215744	1.79241	0.0800181
0.003917	0.411268	12.2263	0.545815			0.004097	0.430234	5.21255	0.232703			0.004588	0.481764	3.84609	0.171701
0.005987	0.628609	18.5692	0.828984			0.006025	0.632586	7.56866	0.337886			0.00611	0.641545	5.05484	0.225662
0.008093	0.849721	25.0005	1.11609			0.007968	0.836669	9.9359	0.443567			0.007982	0.838151	6.54615	0.292239
0.009931	1.04274	30.3403	1.35448			0.009959	1.04572	12.3325	0.550557			0.01007	1.0572	8.18651	0.365469
0.01315	1.38122	39.2685	1.75306			0.01388	1.45756	17.09	0.762945			0.01304	1.369	10.5614	0.471492
0.01881	1.9749	51.0665	2.27975			0.01912	2.00809	23.2974	1.04006			0.01894	1.9891	15.1813	0.677736
0.02521	2.64692	60.1744	2.68636			0.02515	2.64068	30.0085	1.33966			0.02505	2.6304	19.8667	0.886904
0.03477	3.6513	68.799	3.07138			0.03397	3.56672	38.4727	1.71753			0.03379	3.54799	26.2794	1.17319
0.04356	4.57408	74.0731	3.30683			0.04215	4.42567	44.884	2.00375			0.04218	4.42876	31.798	1.41956
0.05422	5.69331	78.7883	3.51734			0.05066	5.31973	50.2968	2.24539			0.05133	5.38987	37.1532	1.65863
0.06649	6.98183	82.8328	3.69789			0.0604	6.34251	55.2472	2.46639			0.06132	6.43819	42.1803	1.88305
0.0802	8.42058	86.2672	3.85122			0.07157	7.51487	59.7366	2.66681			0.07219	7.57956	46.778	2.0883
0.09492	9.96706	89.308	3.98696			0.08401	8.82106	63.7037	2.84392			0.08143	8.55058	50.0445	2.23413
0.1108	11.6368	91.915	4.10335			0.09792	10.2819	67.2385	3.00172			0.09437	9.90846	53.9723	2.40948
0.1362	14.2994	95.2904	4.25403			0.113	11.8615	70.3569	3.14093			0.1086	11.404	57.4953	2.56675
0.1724	18.0975	98.994	4.41937			0.136	14.2774	74.1921	3.31215			0.1359	14.2645	62.7859	2.80294
0.2083	21.8697	101.881	4.54826			0.1719	18.0447	78.7398	3.51517			0.1721	18.072	67.9854	3.03506
0.2447	25.6987	104.245	4.65381			0.2081	21.8539	82.2275	3.67087			0.2081	21.8524	71.8208	3.20628
0.2803	29.4326	106.179	4.74015			0.2446	25.6836	85.0568	3.79718			0.2442	25.6359	74.9175	3.34453
0.3167	33.2539	107.9	4.81698			0.2803	29.4325	87.3864	3.90118			0.2806	29.4588	77.4904	3.45939
0.3529	37.056	109.365	4.88238			0.3171	33.2936	89.4525	3.99341			0.3167	33.254	79.707	3.55835
0.3892	40.8685	110.696	4.9418			0.3525	37.0167	91.1437	4.06891			0.3526	37.0257	81.5831	3.6421
0.4256	44.6829	111.901	4.99557			0.3887	40.8095	92.7111	4.13889			0.3894	40.8836	83.2889	3.71825
0.4621	48.5206	112.994	5.04438			0.4255	44.6742	94.1391	4.20264			0.4261	44.7406	84.8284	3.78698
0.4979	52.277	113.964	5.08766			0.4621	48.5211	95.4342	4.26045			0.4616	48.4681	86.1625	3.84654
0.5318	55.8415	114.829	5.1263			0.4984	52.3304	96.6036	4.31266			0.4984	52.3348	87.4343	3.90332
0.5701	59.8596	115.7	5.16519			0.5338	56.0532	97.6711	4.36032			0.5342	56.0913	88.5637	3.95374
0.6063	63.6634	116.488	5.20034			0.5701	59.8612	98.6546	4.40422			0.5697	59.8221	89.5979	3.9999
0.642	67.4132	117.224	5.2332			0.6066	63.691	99.5763	4.44537			0.606	63.6249	90.5819	4.04384
0.6779	71.1814	117.917	5.26417			0.6425	67.4646	100.46	4.4848			0.6424	67.4522	91.4926	4.08449
0.7143	74.9989	118.563	5.29301			0.6785	71.2436	101.248	4.51998			0.6778	71.173	92.3432	4.12247
0.7511	78.866	119.183	5.32066			0.7146	75.0358	102.027	4.55476			0.714	74.9665	93.1654	4.15917
0.7861	82.5455	119.787	5.34762			0.7502	78.7742	102.728	4.58607			0.7505	78.804	93.965	4.19486
0.8224	86.3479	120.364	5.37341			0.786	82.535	103.412	4.6166			0.7866	82.5887	94.6926	4.22735
0.8581	90.1005	120.868	5.39591			0.8221	86.32	104.061	4.64557			0.8222	86.3361	95.3844	4.25823
0.8944	93.9068	121.384	5.41894			0.8583	90.1192	104.677	4.67306			0.858	90.0861	96.0416	4.28757
0.9301	97.657	121.884	5.44125			0.8945	93.9249	105.287	4.70032			0.8943	93.8976	96.6744	4.31582
0.966	101.432	122.337	5.46148			0.9305	97.6984	105.816	4.72391			0.9301	97.66	97.2503	4.34153
0.9886	103.804	122.646	5.47528			0.9662	101.456	106.351	4.74782			0.9662	101.453	97.8149	4.36673
						0.9891	103.855	106.687	4.76281			0.9894	103.892	98.1533	4.38184
